19 **Abstract**

20 Previous studies have shown that it is possible to accurately predict wheat grain quality and yields using  
21 microbial indicators. However, it is uncertain what the best timing for sampling is. For optimal usefulness  
22 of this modeling approach, microbial indicators from samples taken early in the season should have the best  
23 predictive power. Here, we sampled a field every two weeks across a single growing season and measured  
24 a wide array of microbial parameters (amplicon sequencing, abundance of N-cycle related functional genes,  
25 and microbial carbon usage) to find the moment when the microbial predictive power for wheat grain baking  
26 quality is highest. We found that the highest predictive power for wheat grain quality was for microbial  
27 data derived from samples taken early in the season (May–June) which coincides roughly with the seedling  
28 and tillering growth stages, that are important for wheat N nutrition. Our models based on LASSO  
29 regression also highlighted a set of microbial parameters highly coherent with our previous surveys,  
30 including alpha- and beta-diversity indices and N-cycle genes. Taken together, our results suggest that  
31 measuring microbial parameters early in the wheat growing season could help farmers better predict wheat  
32 grain quality.

33

34

35

36

37 **Keywords:** wheat microbiome; LASSO regression; grain quality; amplicon sequencing; nitrogen cycle;  
38 community level physiological profiling

39

## 40 **Introduction**

41           As the world population climbs towards the 9-billion-mark, agricultural production is under the  
42 pressure of climate change. The productivity gains from the green revolution have plateaued, traditional  
43 breeding efforts can hardly keep up, and the level of pesticide and inorganic fertilizer use is unsustainable.  
44 New solutions are needed. Integrated microbiocentric approaches to optimize plant production are  
45 promising and have often been proposed to solve some of the many problems agricultural production faces  
46 (Figuerola *et al.* 2012; Schloter *et al.* 2018). Soil microorganisms play a key role in many ecosystem  
47 processes that are central to agricultural production. For instance, soil microorganisms recycle organic  
48 matter, cycle nutrients, abate abiotic stresses, change soil structure and porosity, and promote plant growth  
49 (Ortiz & Sansinenea 2022). However, although it is theoretically known how to modify microbial  
50 communities (Agoussar & Yergeau 2021), it is in practice still a very daunting task because of the  
51 complexity of the communities and their interactions. A first step towards this goal would be to create  
52 microbial-based models predicting agricultural processes, to identify clear targets and key functions or taxa  
53 to manipulate.

54           However, soil microbial communities are very dynamic, which makes it difficult to predict process  
55 rates and to identify key players that would be amenable to manipulation. Soil microbial communities are  
56 strongly influenced by biotic and abiotic factors, such as temperature, precipitations, and plant growth stage,  
57 which all vary in time, often in an unpredictable manner. We recently showed that dry-rewetting cycles  
58 lead to a complete overhaul of the soil microbial communities, much more than small decreases in soil  
59 water content (Wang *et al.* 2022.). Soybean and wheat growth stages were shown to profoundly influence  
60 the microbial diversity associated with the plant, often in interaction with plant compartment, plant  
61 genotype, soil water content and soil history (Moroenyane *et al.* 2021; Azarbad *et al.* 2022; Azarbad *et al.*  
62 2002). Similarly, the effect of the genotype on root and rhizosphere microbial communities varied over  
63 time (years) and with wheat growth stages (Quiza *et al.* 2022). These microbial shifts related to plant growth  
64 stages were previously linked to changes in the composition and concentration of plant root exudates during

65 development (Chaparro *et al.* 2013). The timing of sampling is thus expected to influence the predictive  
66 power microbial parameters, but it is still uncertain what the best sampling time would be and whether  
67 robust time-independent indicators could be identified.

68         Recent microbial-based modeling from our group showed that early sampling of wheat field soil  
69 microbial communities, around seeding or emergence could accurately predict wheat yield and grain baking  
70 quality obtained at the end of the growing season (Asad *et al.* 2021; Yergeau *et al.* 2020) . For instance,  
71 with as little as 5 predictors, such as the abundance of archaeal ammonia-oxidizers, measured shortly after  
72 seeding in May, we were able to predict wheat grain quality with an accuracy of up to 81% (Yergeau *et al.*  
73 2020). In contrast, different ammonium nitrate fertilization regimes did not significantly influence yields  
74 or grain baking quality. In another study encompassing 80 fields across a transect of 500km, microbial  
75 indicators from samples taken in May-June could robustly predict the wheat grain quality and yields at the  
76 end of the growing season (Asad *et al.* 2021). In line with this, earlier work showed that the growth of  
77 willows after 100 days in highly contaminated soil could be predicted by the initial soil microbial diversity  
78 (Yergeau *et al.*, 2015), whereas willows Zn accumulation after 16 months of growth could be predicted by  
79 the relative abundance of specific fungal taxa present at 4 months (Bell *et al.* 2015). Therefore, it seems  
80 that the early soil microbial data can accurately predict ecosystem processes, such as plant productivity and  
81 produce quality. However, these studies did not compare microbial data taken at different timepoints, so it  
82 is unclear if early sampling has the highest predictive power in microbial-based models.

83         Here, we sampled the same experimental field every two weeks over the course of a single growing  
84 season. We sequenced the 16S rRNA gene and the ITS region, quantified the abundance of key N-cycle  
85 genes, and measured the community level physiological profiles as microbial indicators and linked them to  
86 grain baking quality using statistical learning approaches. Our goals were to 1) identify the most appropriate  
87 sampling date for modelling, and 2) identify robust microbial indicators linked to grain baking quality.

## 88 **Methods**

### 89 *Experimental design and sampling*

90 Four rainfall manipulation treatments were set-up in 2016 at the Armand-Frappier Sante  
91 Biotechnologie Centre (Laval, Québec, Canada) using 2m x 2m rain-out shelters that excluded passively  
92 0%, 25%, 50%, and 75% of the natural precipitation. The rainfall exclusion treatments were performed  
93 using rain-out shelters, which were covered with various amount of transparent plastic sheeting. The rain  
94 was intercepted by the plastic sheeting and guided in a gutter and downspout and collected in 20L buckets  
95 that were manually emptied following significant rainfall events. Two wheat genotypes were seeded under  
96 these shelters (drought sensitive, *Triticum aestivum* cv. AC Nass and drought tolerant, *Triticum aestivum*  
97 cv. AC Barrie), and the experiment was replicated over 6 fully randomized blocks, resulting in 48 plots (4  
98 treatments x 2 genotypes x 6 blocks). Seeds harvested from each of the plots were re-seeded in the exact  
99 same plot the following year. Soil was sampled every 2 weeks on May 10<sup>th</sup> (seeding time, T = 0), May 24<sup>th</sup>,  
100 June 7<sup>th</sup>, June 21<sup>st</sup>, July 5<sup>th</sup>, July 19<sup>th</sup>, and August 1<sup>st</sup> 2018. A composite soil sample was prepared by  
101 collecting 10-cm deep soil cores from the 4 corners and the centre of each plot (4 treatments x 6 blocks x 2  
102 cultivars x 7 sampling dates = total 336 samples). From 2016 to 2018, the average daily rainfall recorded  
103 on this site was 2.2 mm-3.5 mm. Soil water content within rainfall exclusion treatments showed significant  
104 differences among soil sampling dates (Wang *et al.* 2022).

### 105 *Amplicon sequencing and data analysis*

106 Total genomic DNA was extracted from the 336 soil samples with the DNeasy PowerLyzer Power  
107 Soil Kit (Qiagen) following the manufacturer's instructions. The concentration and the quality of the DNA  
108 was checked using a Nano Drop ND-1000 Spectrophotometer (Nano Drop Technologies Inc., Thermo  
109 Scientific, U.S.A.). The amplicon sequencing libraries for the bacteria and archaeal 16S rRNA gene and  
110 ITS regions were prepared according to the previously described protocols (Asad *et al.* 2021). The primers  
111 pairs used for the amplification were 515F/806R (Caporaso *et al.* 2012) and ITS1F/58A2R (Martin &  
112 Rygielwicz, 2005), for the bacterial and archaeal 16S rRNA gene and the fungal ITS region, respectively.

113 PCR amplifications were conducted in a T100™ Thermal Cycler (Bio-Rad, U.S.A.) as previously described  
114 (Wang *et al.* 2022). PCR products were confirmed through visualization in 1% agarose gel and purified  
115 using AMPure XP beads (Beckman Coulter, Indianapolis, U.S.A.). PCR libraries were pooled together and  
116 sent to the Centre d'expertise et de services Genome Québec (Montréal, Canada) for Illumina MiSeq 2 x  
117 250 bp amplicon sequencing as detailed previously (Wang *et al.* 2022). A total of 17,084,986 16S rRNA  
118 gene reads and 22,411,001 ITS region reads were produced. The raw sequencing data and its meta data  
119 were deposited in the NCBI BioProject under accession PRJNA686206.

120 Sequence pre-processing, including filtering and quality testing, was performed using UCHIME  
121 (Edgar *et al.* 2011), following previously published bioinformatic pipelines (Wang *et al.* 2022). The  
122 classification of Operational Taxonomic Units (OTUs) was performed using the RDP 16S rRNA Reference  
123 Database (Wang *et al.* 2007) and the UNITE ITS Reference Database (Nilsson *et al.* 2019). The uniformity  
124 of the amplicon sequences belonging to the same operational taxonomic units (OTUs) was tested using  
125 UPARSE (Edgar *et al.* 2013). Sample rarefaction was performed using an in-house galaxy pipeline as  
126 previously discussed (Wang *et al.* 2022.). Alpha (e.g., Shannon, Simpson, Chao1, Abundance-based  
127 Coverage Estimators), beta (Bray-Curtis dissimilarity) and phylogenetic diversity were calculated as  
128 detailed in Wang *et al.* (2022).

### 129 *Quantitative real-time PCR (qPCR) and community level physiological profiling (CLPP)*

130 We measured the abundance of the 16S rRNA gene, the ITS region, and N-cycle related genes  
131 (bacterial and archaeal *amoA*, *nirK*, *nosZ*) for the 336 samples using real-time PCR SYBR Green assays,  
132 as previously described (Asad *et al.* 2021). The Fungal:Bacterial (F:B) ratio was then calculated by dividing  
133 the ITS region abundance by the 16S rRNA gene abundance. EcoPlates colorimetric assays (Biolog,  
134 Hayward, CA) were used to measure microbial carbon use patterns with diluted soil (1/10 in water) and a  
135 168-hour incubation, as previously described (Asad *et al.* 2021).

### 136 *Wheat grain and flour quality*

137 Wheat grain was harvested from the 48 plots at the end of the growing season (8<sup>th</sup> August 2018)  
138 and the grain and flour baking quality were analyzed in the quality control laboratory of Les Moulins de  
139 Soulanges (St-Polycarpe, QC). Four main quality indicators were used in our modeling efforts: grain protein  
140 content, grain gluten content, flour peak maximum time (PMT; time for the dough to reach its maximum  
141 consistency following hydration), flour maximum recorded torque (BEM, maximal consistency as  
142 measured as resistance to mechanical mixing) (Freund and Kim 2006). A good quality grain for bread is  
143 expected to have a high protein and gluten content. A good quality flour will have a high maximum torque  
144 (high consistency) and a short PMT (rapid to reach maximal consistency) when hydrated.

#### 145 *Statistical analysis*

146 All the statistical analyses were performed in R (v.4.1.2). To visualise the differences in the  
147 microbial community (amplicon and CLPP datasets) across sampling dates, treatments, and cultivars, we  
148 used the function *cmdscale* of the *vegan* package to produce principal coordinate analysis (PCoA) based on  
149 the Bray-Curtis dissimilarity index. The effect of sampling date, treatments, block, genotypes on the  
150 microbial community structure and carbon utilisation patterns was tested using permutational multivariate  
151 analysis of variance (PERMANOVA) based on the Bray-Curtis dissimilarity index (*adonis2* function of the  
152 *vegan* package). Three-way repeated measures analysis of variance (rmANOVA) using the *aov* function  
153 was used to test for significant differences in alpha diversity, N-cycle related genes and ITS region and 16S  
154 rRNA gene abundance. The normality of the residuals was examined graphically using *ggplot* and was  
155 tested by the Shapiro-Wilk test using the *shapiro.test* function. If the data did not meet the requirements of  
156 the tests, it was log or square root transformed. The homoscedasticity of the data was evaluated using the  
157 Mauchly's sphericity test of the *rstatix* package. Correlation analyses between microbial parameters and  
158 wheat grain quality were performed with the *cor.test* function together with the *p.adjust* function to adjust  
159 the p-value with the Benjamin-Hochberg correction for multiple tests.

#### 160 *Predictive modeling*

161 Our goal was to model grain quality (protein, gluten, BEM and PMT) using the microbial indicators  
162 measured (bacterial and fungal alpha diversity, bacterial and fungal beta-diversity, carbon utilization  
163 patterns, F:B ratio, and N-cycle gene abundance), for each sampling date separately to find the optimal  
164 sampling date for modeling. Since our PERMANOVAs revealed that the two wheat genotypes harbored  
165 significantly different microbial communities, we modeled them separately. This resulted in 14 different  
166 microbial datasets containing each 24 samples. We excluded outlier data points using the *rstatix* package.

167 To reduce the dimensionality of the 16S rRNA gene and ITS region amplicon OTU tables and of  
168 the microbial carbon usage, we performed a procedure called orthogonalization. In brief, we performed a  
169 principal component analysis (*PCA* function of the *FactomineR* package) on Hellinger-transformed  
170 (*decostand* function of *vegan* package) OTU tables or carbon usage patterns and used the 5 first principal  
171 components in the models. Individual OTUs and carbon substrates were then correlated to these 5  
172 components to have an idea of the taxonomic composition of the OTUs or carbon substrates influencing  
173 each of the components. We kept OTUs and carbon substrates with correlation having a  $P < 0.05$ . For the  
174 OTUs, a taxonomic summary at the genus level was generated using the *Phyloseq* package.

175 We chose least absolute shrinkage and selection operator (LASSO) regression as a modeling  
176 method to predict wheat quality for the following reasons: i) to avoid overfitting, which may be problematic  
177 with other regression methods (least square regression or general linear model), especially when there are  
178 many explanatory variables, (ii) to be able to select only the most important predictive variables (i.e.,  
179 feature), to reduce the mean error of the model, and (iii) to have an interpretable model. The microbial  
180 features included: principal components 1-5 derived from the microbial OTU and carbon usage tables, the  
181 abundance of N-cycle related gene, the F:B ratio, and the bacterial and fungal alpha-diversity. First, we  
182 standardized the data (other than the PCs) using the *scale* function and then selected the optimal lambda  
183 values with 10-fold cross validation. We selected the best penalty score based on the lowest lambda value,  
184 which indicates non-collinear effects and low levels of inflated variance in the selected variables. Then, we  
185 evaluated the model accuracy and performance using the best lambda values. The predictive strength of the



186 best LASSO model for grain quality was tested using the *prediction* function of the caret package. The  
187 Akaike Information Criterion (AIC) and the Bayesian Information Criterion (BIC) were also calculated to  
188 evaluate the models' performance. Finally, we compared the accuracy and performance across the different  
189 sampling dates.

## 190 **Results**

### 191 *Effect of experimental treatments on microbial parameters*

192 The sampling date significantly affected all microbial parameters, including microbial carbon utilization,  
193 microbial diversity, the F:B ratio, and the abundance of N-cycle-related genes (Tables 1 and 2).  
194 Furthermore, the structure of the bacterial and archaeal community was influenced by sampling dates and  
195 blocks whereas the fungal community was influenced by sampling dates, block, and wheat genotypes  
196 (Table 2). The alpha diversity of microbial communities (16S and ITS) was not significantly affected by  
197 the precipitation exclusion treatments and wheat genotypes ( $P > 0.05$ ). However, significant differences in  
198 the Shannon ( $P < 0.001$ ) and Simpson ( $P < 0.001$ ) diversity indices, as well as the phylogenetic diversity ( $P$   
199  $< 0.001$ ) of the bacterial and archaeal, and fungal communities were observed among sampling dates. There  
200 was a significant interactive effect ( $P < 0.05$ ) of the precipitation treatment and wheat genotype on the  
201 abundance of archaeal *amoA*, *nirK* and *nosZ* genes, and a significant difference in the F: B ratio across  
202 sampling dates ( $P < 0.001$ ) (Table 1).

### 203 *Correlation between microbial and grain quality parameters*

204 We did not find a significant effect of rainfall exclusion treatment on grain qualities but found a  
205 significant effect of wheat genotype on protein content ( $P < 0.001$ ) and PMT ( $P < 0.001$ ), so we decided to  
206 treat the two genotypes separately and all the precipitation treatments together. Correlations between grain  
207 quality and microbial carbon use fluctuated over time (Table 3). The carbon sources were all negatively  
208 correlated to grain quality indicators for the DT genotype whereas both positive and negative correlations  
209 were found for the DS genotype (Table 3). The absolute abundance of microbial N-cycling genes was found  
210 to be correlated to grain quality measurements for soil collected on the early sampling dates (Table 4). The  
211 *amoA* (archaeal and bacterial), *nirK* and *nosZ* genes quantified in the DT genotype samples on May 10 and  
212 May 24 were negatively correlated to protein and gluten content (Table 4). Only the F:B ratio was positively  
213 correlated to protein content (Table 4). For the DS genotype, the *amoA* (archaeal and bacterial) and the  
214 *nosZ* genes were negatively correlated to the grain quality parameters and the F:B ratio was positively

215 correlated to PMT for soil samples collected on May 24 (Table 4). Many significant correlations between  
216 microbial richness/diversity indices and grain baking quality were found, mostly for the DT genotype  
217 (Table 5). Significant correlations between microbial community descriptors (PCA axes for OTUs and  
218 microbial carbon use) and grain quality indicators for sampling dates in May and June were also identified.

### 219 *Model performance in predicting grain quality at different plant growth stages*

220 We applied least absolute shrinkage and selection operator (LASSO) regressions for each sampling date  
221 separately, to identify the date where model accuracy would be maximal to predict grain quality. In the case  
222 of the DT genotype, we obtained a high model accuracy to predict certain grain quality indicators, with  
223 mean square errors ranging from 0.08 to 0.51, and AIC values inferior to -8.35 (Table 6). The best models  
224 identified were based on microbial indicators from May 10, May 24, and June 07. Gluten and protein  
225 content predicted with the LASSO regression had the highest accuracy for microbial indicators measured  
226 from samples collected on May 10. These models selected 11 and 8 variables, resulting in  $R^2$  of 0.95 and  
227 0.76, for gluten and protein respectively (Table 6 and Figure 1). These models were cross validated with  
228 lambda  $\lambda$  values of 0.04 to 0.15, which resulted in the lowest mean square errors (0.08 to 0.36). The model  
229 accuracy for gluten and protein prediction decreased over time, and it was even impossible to generate a  
230 significant model for some dates (Table 6). The best sampling dates for the other quality indicators were  
231 later in the growing season with June 7 being the best sampling time to predict BEM ( $R^2=0.92$ ) and May  
232 24 being the best time to predict PMT ( $R^2=0.57$ ) (Table 6 and Fig. 1). The most parsimonious model across  
233 all indicators was the one predicting PMT which only included 2 predictors (Table 6). For some sampling  
234 dates, no descriptive variable in the microbial dataset was selected by the LASSO procedure, resulting in a  
235 null model (Table 6). This was the case for gluten on June 7, July 19, and August 1, for PMT on May 10,  
236 June 7, June 21, July 5 and July 19, and for BEM on June 21 and July 05 (Table 6).

237 The overall model performance in predicting grain quality for the DS genotype was lower than the  
238 DT genotype (Table 7). Maximum accuracy of LASSO regression model was observed on June 7 for gluten

239 and PMT, on May 10 for protein, and June 21 for BEM (Table 7). The best PMT and BEM predictive  
240 models used about half the number of the total predictors used in the best gluten and protein predictive  
241 models (PMT: 4, BEM: 6, gluten: 14 and protein: 11) (Table 7 and 9). These models included many fungal  
242 indicators (Table 9). Predictive modeling of protein content between May 24 and July 05, and on August 1  
243 was unsuccessful and the level of accuracy of the model was lower on July 19 (Table 7). A similar trend  
244 was observed for PMT: sampling dates after June 7 resulted in less accurate or no model at all (Table 7).  
245 BEM prediction was also unsuccessful for samples collected on June 07. Similar to the DT genotype, the  
246 predictive models for the DS genotype dataset showed the best accuracy for quality prediction with  
247 microbial data from the May and June samplings.

#### 248 *Microbial features selected in the optimal models*

249 The best LASSO models for the DT genotype contained microbial features that varied but were  
250 often the principal components derived from OTU tables or carbon utilization patterns, or the alpha  
251 diversity indices. Bacterial and archaeal OTUs from the *Nitrosphaera*, *Rhodoplanes*, *Solirubrobacter*, and  
252 *Terrimicrobium* were the main contributors to the principal component 2 (explained variance: 5.1%)  
253 calculated from the May 10 dataset that was selected in the models for gluten and protein content (Fig. 2).  
254 In contrast, the main contributors to the bacterial and archaeal principal component 1 (explained variance:  
255 6.0%), 2 (5.2%) and 3 (5.1%) selected for the model predicting BEM on June 7 were from the *Conexibacter*,  
256 *Gaiella*, *Nitrososphaera*, *Hyphomicrobium* and *Gp16* genera (Fig. 2). The fungal OTUs that contributed to  
257 the principal components selected in the May and June models belonged to the *Mortierella*, *Ganoderma*,  
258 and *Giliomastix* genera (Fig. 2). We found a negative relationship between the fungal phylogenetic diversity  
259 index and gluten content and a positive relationship between bacterial Simpson diversity and gluten content  
260 and BEM in the May 10 and June 7 models (Table 8).

261 Principal components derived from carbon utilization patterns were also included in all our most  
262 accurate models for the DT genotype (Table 8). The models predicting protein and gluten content (May 10)

263 selected 4 of the top 5 principal components included, for which the most important contributing carbon  
264 substrates were Putrescine ( $r_s=-0.91$ ;  $P<0.001$ ), L-Arginine ( $r_s=0.74$ ;  $P<0.001$ ), Pyruvic Acid methyl ester  
265 ( $r_s=-0.62$ ;  $P<0.001$ ), Glycogen ( $r_s=0.59$ ;  $P<0.001$ ) and L-Threonine ( $r_s=-0.56$ ;  $P<0.001$ ). The model  
266 predicting BEM (June 7) selected principal component 2 (explained variance: 9.3%), 3 (7.4%), and 4 (4.7%)  
267 and the most important contributing carbon substrates of the principle components were alpha-cyclodextrin  
268 ( $r_s=0.69$ ;  $P=0.002$ ), alpha-keto butyric Acid ( $r_s=0.68$ ;  $P=0.003$ ),  $\gamma$ -amino butyric acid ( $r_s=-0.66$ ;  $P=0.006$ ),  
269 Glucose 1-phosphate ( $r_s=-0.71$ ;  $P=0.001$ ). Finally, the principal component 2 (explained variance: 7.5%)  
270 selected in the model predicting PMT (May 24) was correlated to glycogen ( $r_s=0.59$ ;  $P=0.002$ ), alpha-  
271 cyclodextrin ( $r_s=0.68$ ;  $P<0.001$ ) and  $\gamma$ -amino butyric acid ( $r_s=-0.65$ ;  $P=0.004$ ). We also observed a negative  
272 relationship between protein content and *nirK* (regression coef. = -0.183) and gluten content and *nosZ*  
273 (regression coef. = -0.235) in the models obtained on May 10 (Table 7).

274 As for the DT genotype models, the models for the DS genotype were mainly composed of principal  
275 components calculated from the OTU tables and from the carbon utilization patterns, and from alpha-  
276 diversity indices (Table 9). The LASSO model predicting protein content selected the bacterial principal  
277 component 4 (explained variance: 4.9%) for the May 10 sampling date (Table 9). This principal component  
278 was correlated with OTUs belonging to the *Nitrososphaera*, *Rhodoplanes*, *Solirubrobacter*, and  
279 *Terricomicrobium* (Fig. 3). On the same date, the fungal OTUs contributing the most to the principal  
280 component 1 (explained variance: 7.3%), 3 (5.6%), 4 (5.5%), and 5 (5.2%) belonged to the *Acremonium*,  
281 *Mortierella*, *Pezizella*, and *Tetracladium* (Fig. 3). On June 7, the models predicting gluten content and PMT  
282 selected the bacterial principal components 2, 4, and 5 (Table 9). These axes explained 4.7-4.5% of the  
283 variation and were correlated to OTUs related to *Giella*, *Gp6*, *Hyphomicrobium*, *Nitrososphaera*,  
284 *Rhodoplanes*, and *Solirubrobacter* (Fig. 3). On June 21, the model predicting BEM selected the bacterial  
285 principal components 2 and 4 (Table 9), which explained 4.8% and 4.7% of the variation and were  
286 correlated to OTUs related to *Nitrososphaera*, *Giella*, *Gp6*, *Pseudonocardia*, *Bradyrhizobium*, and  
287 *Lysinibacillus* (Table 9). The fungal PC 1 (7%), 2 (6.2%), 4 (5.0%), and 5 (4.9%) selected for the June 7

288 were correlated to OTUs related to *Acremonium*, *Mortierella*, and *Tetracladium* (Fig. 3). The fungal PC2  
289 (5.8%) selected in the model for BEM in June 21 was linked to OTUs related to *Ganoderma*, *Mortierella*,  
290 *Pezizella* and *Pseudeurotium*. The protein and BEM models of the DS genotype selected the fungal Chao1  
291 index, which positively influenced the quality whereas the gluten and protein models selected fungal  
292 phylogenetic diversity indices that positively affected gluten content on June 07, and negatively affected  
293 protein content on May 10 (Table 9).

294 For the May 10 model (protein), the carbon substrates contributing the most to the selected principal  
295 components were beta-methyl D-glucoside ( $r_s=0.61$ ;  $P=0.001$ ), D-glucosamine acid ( $r_s= -0.58$ ;  $P=0.003$ ),  
296 D-galactonic acid  $\gamma$ - lactone ( $r_s =-0.53$ ;  $P=0.008$ ). For the June 7 models (gluten and PMT), the carbon  
297 substrates contributing the most to the selected PC were Glucose 1-phosphate ( $r_s=0.81$ ;  $P<0.001$ ), D-  
298 galactonic acid  $\gamma$ -lactone ( $r_s=0.64$ ;  $P=0.0005$ ), 4-hydroxy benzoic acid ( $r_s= -0.66$ ;  $P=0.0005$ ), 2-hydroxy  
299 benzoic acid ( $r_s=0.56$ ,  $P=0.003$ ). Finally, for the June 21 model (BEM), the carbon substrates contributing  
300 the most to the selected PC were L-phenylalanine ( $r_s= 0.55$ ;  $P= 0.003$ ) and alpha-cyclodextrin ( $r_s=-0.49$ ;  
301  $P=0.011$ ). We also observed that the models selected the fungal: bacterial ratio, which negatively influenced  
302 the gluten content on June 7 and positively influenced BEM on June 21. There was a negative relationship  
303 between the abundance of the bacterial *amoA* gene and gluten content, and a positive relationship between  
304 *nosZ* and gluten content on June 7 (Table 9).

305 **Discussion**

306 Plant- and soil-associated microbial communities vary throughout the seasons/plant growth stages  
307 (Chaparro *et al.* 2013, 2014; Moroenyane *et al.* 2021; Azarbad *et al.* 2022; Azarbad *et al.* 2021; Wang *et*  
308 *al.* 2022) and it was unsure what was the best timing to create models to predict wheat grain quality. By  
309 sampling the same field every 2 weeks and measuring a wide range of microbial parameters, we were able  
310 to show with LASSO regression that the predictive value of microbial parameters is optimal during the  
311 earlier stages of wheat growth, at the seedling (May) or tillering stages (June). Many microbial parameters  
312 were consistently singled out by the regression models, which could allude to a mechanistic link between  
313 grain quality and the parameter identified, or simply to covariation between the microbial parameter and  
314 grain quality due to a third unmeasured parameter. Our work focused on wheat, and although it would be  
315 interesting to see if similar patterns apply to other crops, it is the first and necessary step to start building  
316 microbial-based predictive models for crop yields and quality.

317 All the best models were made with data collected before the end of June, which is at the early  
318 stages of wheat growth in Quebec. This is coherent with our previous results that showed that good  
319 predictive models could be made with soil samples taken in May or June (Yergeau *et al.* 2020; Asad *et al.*  
320 2021) even though different sampling point were not compared. Other work done on willows showed that  
321 early microbial community composition could predict the potential of the trees to decontaminate soil or to  
322 survive (Bell *et al.* 2014; Yergeau *et al.* 2015). Navarro-Noya *et al.* (2022) showed that the complexity of  
323 microbial structure and diversity increases with maize development, and that the effect of agricultural  
324 practices on the soil microbiome was more evident at the early stages, which could explain why early  
325 microbial indicators performed better. This is encouraging for future work, as the ultimate goal of this type  
326 of predictive modeling is to have a tool that could be used to guide management strategies for farmers.  
327 Maximum usefulness will happen if indicators of yields or quality can be measured early, when it is still  
328 possible to intervene. It could be that the sampling dates highlighted are the ones that are the most critical  
329 for wheat grain quality, but for wheat, it is generally thought that the grain filling stage (around mid July in

330 Quebec) is the most critical stage in term of N nutrition for high quality grain (Zörb *et al.* 2018). However,  
331 unless there is an unlikely massive microbial immigration, the microorganisms that can modulate or are  
332 indicative of soil N availability are already present in the soil early at seeding, and it is likely that their  
333 abundance and diversity at this stage could predict wheat grain quality. In fact, it was recently suggested  
334 that, because of their potential to be influenced by legacy and current environmental conditions, microbial  
335 communities act as multivariate integrators of the current and past physico-chemical conditions of their  
336 immediate environment, making them highly suitable predictors for ecosystem processes (Correa-Garcia *et*  
337 *al.* 2022).

338         Microbiome data have characteristics (sparsity, high dimensionality, zero-inflated) that often make  
339 them challenging to use in models. Here, we transformed the OTU and carbon utilization patterns tables  
340 using eigenvalue decomposition, namely principal component analysis, which reduces the dimension of the  
341 datasets to n-1 principal components that are orthogonal (not collinear) and ordered in decreasing order of  
342 variance explanation, moving from several thousands of descriptors to 23, in the case of the OTU tables.  
343 We further reduced the dimensionality by only utilizing the first 5 principal components in our LASSO  
344 regression, with the idea that these components contained a large part of the variation in the original dataset.  
345 One downside of this approach is that it makes the models less directly interpretable, with principal  
346 components being composite variable for many OTUs or carbon sources. However, using correlation  
347 analyses of individual OTUs with the principal components we were able to identify taxonomic groups and  
348 carbon sources that were linked with the principal components. We also used LASSO regression that selects  
349 of the most significant variables and shrinks the regression coefficient of the other variable to zero,  
350 generally producing parsimonious, highly interpretable models containing a few variables. Although non-  
351 parametric methods (neural network, random forest, support vector machine, etc.) could produce more  
352 accurate models, they are often less interpretable, meaning that the predictors influencing the output cannot  
353 be easily identifiable. Still, our models had high accuracy of 50-95%. The predictive performance of  
354 LASSO regression to predict biological characteristics from microbiome data was shown to be excellent



355 for zero-inflated data such as microbial OTU count tables (Xiao *et al.* 2018; Dong *et al.* 2020). We also had  
356 good results using linear regression coupled with forward/backward selection with a preselection of  
357 individual OTUs that showed the strongest correlations with the predictors (Yergeau *et al.* 2020; Asad *et*  
358 *al.* 2021).

359         General community descriptors were often selected as the best explanatory variables in the models.  
360 Alpha diversity indices and eigenvectors (such as principal components) derived from microbial  
361 community structures are integrators of many parameters. Interestingly, it suggests that shallow sequencing  
362 to recover alpha and beta diversity patterns together with community level carbon utilization profiling  
363 would be sufficient to model wheat grain quality. Additionally, some specific microbial parameters were  
364 consistently singled out by the analyses. For example, the negative relationships between wheat quality and  
365 the abundance of the *nirK*, *nosZ* and bacterial *amoA* genes were well aligned with previous work (Yergeau  
366 *et al.* 2020; Asad *et al.* 2021). The relative abundance of OTUs belonging to the ammonia-oxidizing archaea  
367 taxon *Nitrososphaera* were also highly correlated with many of the principal components selected in the  
368 models, and the abundance of both the archaeal and the bacterial *amoA* genes was often negatively  
369 correlated to quality parameters. This further suggests the key role of nitrification and denitrification in  
370 wheat grain quality, as proposed before (Yergeau *et al.* 2020; Asad *et al.* 2021; Wang *et al.* 2022). Since  
371 grain quality is linked to its protein content, it is energetically more efficient for the plant to uptake  
372 ammonia, which can directly be incorporated into amino acids, whereas nitrate will need to be transformed  
373 back to ammonia (Beeckman *et al.*, 2018). Nitrate uptake also requires more energy than ammonia uptake  
374 (Beeckman *et al.*, 2018). Finally, nitrate is prone to leach and is a substrate for denitrification, which will  
375 lead to loss of nitrogen to the atmosphere. Manipulating or inhibiting the activity of these microbial guilds  
376 using, for instance, natural or artificial nitrification inhibitors may increase wheat grain quality. However,  
377 this strategy will need to be further studied to understand potential unwanted effects, as a common  
378 nitrification inhibitor, nitrapyrin, was shown to have off-target effects on the soil microbial community  
379 (Schmidt *et al.* 2022) and that nitrate stimulates lateral root elongation and affects various signaling

380 pathways in the plant (Beeckman et al. 2018). Microbiome manipulation is still in its infancy and, because  
381 of ecological processes underlying community assembly, it will be a challenge (Agoussar & Yergeau,  
382 2021). It is also unclear if microorganisms involved in nitrification and denitrification are sufficient  
383 indicators for accurate modeling of the grain quality, and, consequently, if solely targeting this group will  
384 result in the expected increase in grain quality. As our model showed, general community structure and  
385 diversity seem to also have a prime importance in determining wheat grain quality.

386 Our previous work showed that significant predictive models could be parametrized using  
387 microbial data measured early in the growing season, across a transect of more than 500 km (Asad et al.  
388 2021). Here, we sought to confirm that early microbial measurements were optimal for such predictive  
389 models by focussing on a single field and sampling it every two weeks for a complete growing season.  
390 Taken together, the two studies confirm that our microbial-based models are effective at a large spatial  
391 scale and that they are optimally build using samples taken early in the season. Although we used a different  
392 modeling approach than previously, the selection of ammonia-oxidizers by the models was shared with our  
393 previous studies (Yergeau *et al.* 2020; Asad *et al.* 2021), suggesting a potential key role of this functional  
394 guild for wheat grain quality.

395

## 396 **Acknowledgments**

397 The entire staff of Les Moulins de Soulanges and La Meunerie La Milanaise, and more specifically  
398 Élisabeth Vachon, Stéphanie Carrière, Chafik Baghdadi and Robert Beauchemin, are gratefully  
399 acknowledged for their support of this study. All members of the Labo Yergeau are thanked for their help  
400 in maintaining and setting up the field experiment. Emmy L'Espérance provided the R code used for  
401 repeated-measures ANOVAs.

402

## 403 **Funding**

404 This study was supported by an FRQNT Team Grant (2019-PR-254256) and a Compute Canada Resource  
405 allocation (allocation 2020-3177) on the Graham system (University of Waterloo) to Etienne Yergeau.

406

407 **Conflict of interest**

408 The authors have no conflicts of interest to declare.

409

## 410 **References**

- 411 Agoussar A, Yergeau E. Engineering the plant microbiota in the context of the theory of ecological  
412 communities. *Curr Opin Biotechnol* 2021 ;**70** :220–5.
- 413 Asad NI, Tremblay J, Dozois J *et al.* Predictive microbial-based modelling of wheat yields and grain  
414 baking quality across a 500 km transect in Quebec. *FEMS Microbiol Ecol.* 2021; **97**(2): fiab160.
- 415 Azarbad H, Bainard L, Agoussar A *et al.* The response of wheat and its microbiome to contemporary and  
416 historical water stress in a field experiment *ISME Communications* 2022; **2**: 62.
- 417 Azarbad H, Tremblay J, Giard-Laliberté C *et al.* Four decades of soil water stress history together with  
418 host genotype constrain the response of the wheat microbiome to soil moisture. *FEMS Microbiol*  
419 *Ecol* 2020;**96**: fiaa098.
- 420 Beeckman F, Motte H, Beeckman T. Nitrification in agricultural soils: impact, actors and mitigation. *Curr*  
421 *Opin Biotechnol* 2018; **50**:166–73.
- 422 Bell TH, Cloutier-Hurteau B, Al-Otaibi F *et al.* Early rhizosphere microbiome composition is related to  
423 the growth and Zn uptake of willows introduced to a former landfill. *Environ Microbiol* 2015;  
424 **17**:3025–38.
- 425 Bell TH, El-Din Hassan S, Lauron-Moreau A *et al.* Linkage between bacterial and fungal rhizosphere  
426 communities in hydrocarbon-contaminated soils is related to plant phylogeny. *ISME Journal* 2014;  
427 **8**:331–43.
- 428 Caporaso JG, Lauber CL, Walters WA *et al.* Ultra-high-throughput microbial community analysis on the  
429 Illumina HiSeq and MiSeq platforms. *ISME Journal* 2012 ;**6** :1621–4.
- 430 Chaparro JM, Badri D V., Bakker MG *et al.* Root Exudation of Phytochemicals in Arabidopsis Follows  
431 Specific Patterns That Are Developmentally Programmed and Correlate with Soil Microbial  
432 Functions. *PLoS One* 2013; **8**:1–10.
- 433 Chaparro JM, Badri D V., Vivanco JM. Rhizosphere microbiome assemblage is affected by plant  
434 development. *ISME Journal* 2014 ;**8** :790–803.
- 435 Correa GS, Constant P & Yergeau E. The predictive power of the microbiome. *Trends in Microbiology*  
436 (2022). (Submitted)
- 437 Dong M, Li L, Chen M *et al.* Predictive analysis methods for human microbiome data with application to  
438 Parkinson’s disease. *PLoS One* 2020; **15**:1–18.
- 439 Edgar RC. UPARSE: highly accurate OTU sequences from microbial amplicon reads. *Nat Methods* 2013;  
440 **10**:996–8.
- 441 Edgar RC, Haas BJ, Clemente JC *et al.* UCHIME improves sensitivity and speed of chimera detection.  
442 *Bioinformatics* 2011; **27**:2194–200.

- 443 Figuerola ELM, Guerrero LD, Rosa SM *et al.* Bacterial Indicator of Agricultural Management for Soil  
444 under No-Till Crop Production. *PLoS One* 2012; **7**:1–12.
- 445 Freund W, Kim MY. Determining the Baking Quality of Wheat and Rye Flour. *Future of Flour – A*  
446 *compendium of Flour Improvement* 2006:101–16.
- 447 Martin KJ, Rygiewicz PT. Fungal-specific PCR primers developed for analysis of the ITS region of  
448 environmental DNA extracts. *BMC Microbiol* 2005; **5**:28.
- 449 Moroenyane I, Tremblay J, Yergeau É. Temporal and spatial interactions modulate the soybean  
450 microbiome. *FEMS Microbiol Ecol* 2021; **97**:1–12.
- 451 Navarro-Noya YE, Chávez-Romero Y, Hereira-Pacheco S *et al.* Bacterial Communities in the  
452 Rhizosphere at Different Growth Stages of Maize Cultivated in Soil Under Conventional and  
453 Conservation Agricultural Practices. *Microbiol Spectr* 2022;**10**: e01834-21.
- 454 Nilsson RH, Larsson KH, Taylor AFS *et al.* The UNITE database for molecular identification of fungi:  
455 Handling dark taxa and parallel taxonomic classifications. *Nucleic Acids Res* 2019;**47**: D259–64.
- 456 Ortiz A, Sansinenea E. The Role of Beneficial Microorganisms in Soil Quality and Plant Health.  
457 *Sustainability (Switzerland)* 2022 ;**14**, DOI : 10.3390/su14095358.
- 458 Quiza L, Tremblay J, Pagé AP *et al.* The effect of wheat genotype on microbiome composition is more  
459 evident in roots than rhizosphere and is strongly influenced by time. *ISME comms.* 2022; submitted.
- 460 Schloter M, Nannipieri P, Sørensen SJ *et al.* Microbial indicators for soil quality. *Biol. Fert. Soils.* 2018:  
461 54:1-10.
- 462 Schmidt R, Wang XB, Garbeva P *et al.* The nitrification inhibitor nitrapyrin has non-target effects on the  
463 soil microbial community structure, composition, and functions. *Applied Soil Ecology* 2022;**171**,  
464 DOI: 10.1016/j.apsoil.2021.104350.
- 465 Wang Q, Garrity GM, Tiedje JM *et al.* Naïve Bayesian Classifier for Rapid Assignment of rRNA  
466 Sequences into the New Bacterial Taxonomy. *Appl Environ Microbiol* 2007; **73**:5261 LP – 5267.
- 467 Wang X-B, Azarbad H, Leclerc L *et al.* A Drying-Rewetting Cycle Imposes More Important Shifts on  
468 Soil Microbial Communities than Does Reduced Precipitation. *mSystems* 2022;**7**, DOI:  
469 10.1128/msystems.00247-22.
- 470 Xiao J, Chen L, Yu Y *et al.* A Phylogeny-Regularized Sparse Regression Model for Predictive Modeling  
471 of Microbial Community Data. *Front Microbiol* 2018 ;**9** :1–12.
- 472 Yergeau E, Bell TH, Champagne J *et al.* Transplanting soil microbiomes leads to lasting effects on  
473 willow growth, but not on the rhizosphere microbiome. *Front Microbiol* 2015; **6**:1–14.
- 474 Yergeau É, Quiza L, Tremblay J. Microbial indicators are better predictors of wheat yield and quality  
475 than N fertilization. *FEMS Microbiol Ecol* 2020; **96**:1–13.

476 Zörb C, Ludewig U, Hawkesford MJ. Perspective on Wheat Yield and Quality with Reduced Nitrogen  
477 Supply. *Trends Plant Sci* 2018; **23:1029–37**.

478

479

480 **Figure legends.**

481 **Figure 1.** Observed values vs. predicted values from LASSO regression models for wheat grain gluten  
482 and protein content and flour maximum torque (BEM) and peak maximum time (PMT) for the drought-  
483 tolerant (A) and drought-sensitive genotypes (B).

484 **Figure 2.** The relative abundance of the bacterial and archaeal (A, C) and fungal (B, D) genera  
485 significantly correlated with the first five principal components for the drought tolerant genotype for the  
486 May 10 (A, B) and June 7 (C, D) sampling dates. Others: various genera with relative abundances below  
487 0.1%.

488 **Figure 3.** The relative abundance of the bacterial and archaeal (A, C) and fungal (B, D) genera  
489 significantly correlated with the first five principal components for the drought sensitive genotype for the  
490 May 10 (A, B) and June 7 (C, D) sampling dates. Others: various genera with relative abundances below  
491 0.1%.

492

493 **Table 1.** Three-way repeated measure ANOVA for bacterial and archaeal ammonia monooxygenase, nitrite  
494 reductase, nitrous oxide reductase gene abundance and the 16S: ITS genes ratio for the effect of  
495 precipitation exclusion treatments, sampling dates and genotype.

|                      | <i>AOA</i> | <i>AOB</i> | <i>nirK</i> | <i>nosZ</i> | <i>F:B ratio</i> |
|----------------------|------------|------------|-------------|-------------|------------------|
| treatment            | 1.449      | 0.241      | 0.940       | 1.027       | 0.467            |
| date                 | 46.382***  | 40.379***  | 40.176***   | 79.707***   | 86.755***        |
| genotype             | 0.205      | 0.006      | 0.388       | 0.689       | 0.043            |
| block                | 2.180*     | 3.175**    | 2.682*      | 0.995       | 0.918            |
| treatment × genotype | 4.782**    | 0.993      | 4.356**     | 3.188**     | 0.854            |

496 F-values are shown in the table.

497 Treatment: treatments with precipitation exclusion (0%, 25%, 50%, 75%). Date: sampling dates. Genotype:  
498 drought-sensitive wheat and drought-tolerant wheat. ANOVA significance, “.” 0.1 < P < 0.05; “\*” P < 0.05;  
499 “\*\*” P < 0.01; “\*\*\*” P < 0.001

500



501 **Table 2.** Permanova based on Bray Curtis dissimilarities for microbial carbon utilization profiling (Biolog  
 502 EcoPlate) and community structure based on 16S rRNA gene and ITS region amplicon for the effect of  
 503 precipitation exclusion treatments, sampling dates and genotype.

|                     | <b>Biolog</b>  |       |          | <b>16S</b>     |      |          | <b>ITS</b>     |       |          |
|---------------------|----------------|-------|----------|----------------|------|----------|----------------|-------|----------|
|                     | R <sup>2</sup> | F     | Pr(>F)   | R <sup>2</sup> | F    | Pr(>F)   | R <sup>2</sup> | F     | Pr(>F)   |
| treatment           | 0.013          | 4.95  | 0.002**  | 0.003          | 0.95 | 0.419    | 0.004          | 1.45  | 0.086    |
| date                | 0.105          | 39.71 | 0.001*** | 0.01           | 5.06 | 0.001*** | 0.01           | 2.90  | 0.001*** |
| genotype            | 0.002          | 0.58  | 0.754    | 0.00           | 1.04 | 0.29     | 0.01           | 2.61  | 0.003**  |
| block               | 0.005          | 1.83  | 0.108    | 0.01           | 4.36 | 0.001*** | 0.03           | 11.72 | 0.001*** |
| genotype× treatment | 0.002          | 0.81  | 0.506    | 0.00           | 1.51 | 0.061    | 0.00           | 1.71  | 0.039*   |

504 Treatment: precipitation exclusion (0%, 25%, 50%, 75%). Date: sampling dates. Genotypes: drought-  
 505 sensitive wheat and drought-tolerant wheat. “.” 0.1 < P < 0.05; “\*” P < 0.05; “\*\*” P < 0.01; “\*\*\*” P < 0.001

506

507 **Table 3:** Significant ( $P < 0.05$ ) Spearman correlations between microbial carbon utilization and grain  
 508 baking quality for each sampling date ( $N=24$ ).

| <b>Drought tolerant</b>     |         |        |         | <b>Drought Sensitive</b>     |         |        |         |
|-----------------------------|---------|--------|---------|------------------------------|---------|--------|---------|
| Carbon source               | Quality | $R_s$  | P-value | Carbon source                | Quality | $R_s$  | P-value |
| <b>10-May</b>               |         |        |         | <b>10-May</b>                |         |        |         |
| Beta methyl D-glucoside     | Protein | -0.609 | 0.002   | N-acetyl D-glucosamine       | Gluten  | 0.537  | 0.008   |
| Phenylethylamine            | BEM     | -0.587 | 0.003   | <b>07-Jun</b>                |         |        |         |
|                             |         |        |         | 4-hydroxy benzoic acid       | Gluten  | 0.522  | 0.009   |
| <b>24-May</b>               |         |        |         | <b>21-Jun</b>                |         |        |         |
| $\alpha$ -keto butyric acid | Gluten  | -0.628 | 0.001   | Tween.40                     | Protein | -0.601 | 0.002   |
| <b>21-Jun</b>               |         |        |         | <b>05-Jul</b>                |         |        |         |
| N-acetyl D-glucosamine      | PMT     | -0.562 | 0.005   | L-Serine                     | Protein | -0.547 | 0.007   |
| <b>05-Jul</b>               |         |        |         | D-L alpha glycerol phosphate | Protein | -0.550 | 0.007   |
| Glycogen                    | PMT     | -0.552 | 0.006   | <b>19-Jul</b>                |         |        |         |
| <b>01-Aug</b>               |         |        |         | L-phenylalanine              |         | 0.576  | 0.004   |
| Pyruvic acid methyl ester   | Gluten  | -0.599 | 0.002   |                              | PMT     |        |         |
|                             |         |        |         | <b>01-Aug</b>                |         |        |         |
|                             |         |        |         | L-asparagine                 | PMT     | -0.575 | 0.006   |

509

510

511 **Table 4:** Significant ( $P < 0.05$ ) Spearman correlations between functional gene abundance and grain baking  
 512 quality for each sampling dates (N=24).

| Gene              | Drought tolerant |        |         | Gene              | Drought sensitive |        |         |
|-------------------|------------------|--------|---------|-------------------|-------------------|--------|---------|
|                   | Quality          | $R_s$  | P-value |                   | Quality           | $R_s$  | P-value |
| 10-May            |                  |        |         | 24-May            |                   |        |         |
| <i>nosZ</i>       | Gluten           | -0.406 | 0.054   | <i>AOB</i>        | Gluten            | -0.504 | 0.012   |
| 24-May            |                  |        |         | <i>AOA</i>        | Protein           | -0.406 | 0.055   |
| <i>AOB</i>        | Gluten           | -0.450 | 0.031   | <i>nosZ</i>       | BEM               | -0.400 | 0.059   |
| <i>nirK</i>       | Protein          | -0.441 | 0.035   | <i>F:B ratio</i>  | PMT               | 0.425  | 0.043   |
| <i>AOA</i>        | Protein          | -0.578 | 0.004   | 07-Jun            |                   |        |         |
| <i>F: B Ratio</i> | Protein          | 0.547  | 0.007   | <i>nirK</i>       | Gluten            | -0.441 | 0.035   |
| 07-Jun            |                  |        |         | 21-Jun            |                   |        |         |
| <i>F: B Ratio</i> | Protein          | 0.426  | 0.048   | <i>F: B Ratio</i> | Protein           | 0.406  | 0.054   |
| 21-Jun            |                  |        |         | <i>F: B Ratio</i> | PMT               | -0.406 | 0.055   |
| <i>AOA</i>        | Protein          | -0.563 | 0.005   | <i>F: B Ratio</i> | BEM               | 0.492  | 0.017   |
| <i>AOA</i>        | PMT              | 0.404  | 0.056   | 19-Jul            |                   |        |         |
| 05-Jul            |                  |        |         | <i>nirK</i>       | Gluten            | 0.558  | 0.009   |
| <i>nirK</i>       | Gluten           | -0.443 | 0.034   |                   |                   |        |         |
| <i>nosZ</i>       | PMT              | 0.401  | 0.058   |                   |                   |        |         |
| <i>F: B Ratio</i> | BEM              | 0.479  | 0.021   |                   |                   |        |         |
| 19-Jul            |                  |        |         |                   |                   |        |         |
| <i>AOA</i>        | Protein          | -0.426 | 0.042   |                   |                   |        |         |
| 01-Aug            |                  |        |         |                   |                   |        |         |
| <i>nosZ</i>       | PMT              | 0.392  | 0.058   |                   |                   |        |         |

513

514

515 **Table 5:** Significant ( $P < 0.05$ ) Spearman correlations between bacterial and archaeal and fungal richness  
 516 and diversity and grain baking quality for each sampling dates ( $N=24$ ).

|                          | <b>16S</b> |        |         | <b>ITS</b>               |        |         |       |
|--------------------------|------------|--------|---------|--------------------------|--------|---------|-------|
|                          | Quality    | $R_s$  | P-value | Quality                  | $R_s$  | P-value |       |
| <b>Drought tolerant</b>  |            |        |         | <b>Drought tolerant</b>  |        |         |       |
| <b>07-Jun</b>            |            |        |         | <b>10-May</b>            |        |         |       |
| ACE                      | Protein    | -0.409 | 0.058   | Shannon                  | Gluten | -0.444  | 0.034 |
| <b>05-Jul</b>            |            |        |         | Simpson                  | Gluten | -0.416  | 0.048 |
| Chao1                    | BEM        | 0.472  | 0.023   | <b>Drought sensitive</b> |        |         |       |
| ACE                      | PMT        | -0.467 | 0.025   | <b>21-Jun</b>            |        |         |       |
| <b>Drought sensitive</b> |            |        |         | ACE                      | BEM    | -0.465  | 0.025 |
| <b>10-May</b>            |            |        |         | PD                       | Gluten | 0.439   | 0.036 |
| Chao1                    | Protein    | -0.454 | 0.029   | <b>01-Aug</b>            |        |         |       |
| 24-May                   |            |        |         | Chao1                    | PMT    | 0.512   | 0.015 |
| Shannon                  | BEM        | 0.468  | 0.024   | Chao1                    | BEM    | -0.483  | 0.023 |
| Chao1                    | Protein    | -0.414 | 0.050   | ACE                      | PMT    | 0.493   | 0.020 |
| <b>21-Jun</b>            |            |        |         | PD                       | PMT    | 0.491   | 0.020 |
| PD                       | Protein    | -0.472 | 0.023   |                          |        |         |       |
| Chao1                    | Protein    | -0.482 | 0.020   |                          |        |         |       |
| Chao1                    | Gluten     | -0.520 | 0.011   |                          |        |         |       |
| ACE                      | Protein    | -0.418 | 0.047   |                          |        |         |       |
| ACE                      | Gluten     | -0.446 | 0.033   |                          |        |         |       |
| <b>19-Jul</b>            |            |        |         |                          |        |         |       |
| Chao1                    | Gluten     | 0.549  | 0.007   |                          |        |         |       |
| ACE                      | Gluten     | 0.549  | 0.007   |                          |        |         |       |
| <b>01-Aug</b>            |            |        |         |                          |        |         |       |
| Simpson                  | PMT        | 0.434  | 0.044   |                          |        |         |       |

517

518

519 **Table 6:** Comparative analysis of the LASSO model performance for the wheat grain quality of the drought-tolerant  
 520 genotype (DT).

|                         | T1          | T2          | T3          | T4     | T5     | T6     | T7     |
|-------------------------|-------------|-------------|-------------|--------|--------|--------|--------|
| Date                    | 10-May      | 24-May      | 07-Jun      | 21-Jun | 05-Jul | 19-Jul | 01-Aug |
| <b>Gluten (DT)</b>      |             |             |             |        |        |        |        |
| C.V (best Lambda)       | 0.04        | 0.38        |             | 0.56   | 0.72   |        |        |
| AIC                     | -16.14      | 2.00        |             | 1.33   | 2.00   |        |        |
| BIC                     | -15.09      | 3.04        |             | 2.42   | 3.09   |        |        |
| Nb of variables:        | 11          |             |             | 1      | 1      |        |        |
| MSE (Mean Square Error) | 0.08        | 0.95        |             | 0.92   | 0.95   |        |        |
| R <sup>2</sup>          | <b>0.95</b> | 0.15        |             | 0.54   | 0.54   |        |        |
| <b>Protein (DT)</b>     |             |             |             |        |        |        |        |
| C.V (best Lambda)       | 0.15        | 0.24        | 0.19        | 0.28   | 0.46   | 0.36   | 0.18   |
| AIC                     | -11.64      | -9.21       | -9.56       | -3.40  | 2.00   | 2.00   | -8.24  |
| BIC                     | -10.51      | -8.07       | -8.47       | -2.26  | 3.14   | 3.14   | -7.15  |
| Nb of variables:        | 8           | 5           | 7           | 2      | 1      | 1      | 2      |
| MSE (Mean Square Error) | 0.36        | 0.47        | 0.43        | 0.73   | 0.96   | 0.96   | 0.53   |
| R <sup>2</sup>          | <b>0.76</b> | 0.69        | 0.72        | 0.33   | 0.22   | 0.14   | 0.57   |
| <b>PMT (DT)</b>         |             |             |             |        |        |        |        |
| C.V (best Lambda)       |             | 0.21        |             |        |        |        | 0.42   |
| AIC                     |             | -8.35       |             |        |        |        | 2.00   |
| BIC                     |             | -7.21       |             |        |        |        | 3.18   |
| Nb of variables:        |             | 2           |             |        |        |        | 1      |
| MSE (Mean Square Error) |             | 0.51        |             |        |        |        | 0.96   |
| R <sup>2</sup>          |             | <b>0.57</b> |             |        |        |        | 0.19   |
| <b>BEM (DT)</b>         |             |             |             |        |        |        |        |
| C.V (best Lambda)       | 0.38        | 0.25        | 0.03        |        |        | 0.14   | 0.20   |
| AIC                     | -2.34       | -7.31       | -17.00      |        |        | -8.92  | -5.32  |
| BIC                     | -1.21       | -6.17       | -15.91      |        |        | -7.78  | -4.14  |
| Nb of variables:        | 1           | 2           | 10          |        |        | 7      | 4      |
| MSE (Mean Square Error) | 0.77        | 0.55        | 0.09        |        |        | 0.48   | 0.65   |
| R <sup>2</sup>          | 0.35        | 0.50        | <b>0.92</b> |        |        | 0.58   | 0.47   |

521 AIC= Akaike Information Criterion

522 BIC=Bayesian Information Criterion

523 C. V= Cross validation

524

525 **Table 7:** Comparative analysis of the model performance of LASSO for the wheat grain quality of drought-sensitive  
 526 genotype (DS).

|                         | T1     | T2     | T3     | T4     | T5     | T6     | T7     |
|-------------------------|--------|--------|--------|--------|--------|--------|--------|
| Date                    | 10-May | 24-May | 07-Jun | 21-Jun | 05-Jul | 19-Jul | 01-Aug |
| <b>Gluten (DS)</b>      |        |        |        |        |        |        |        |
| AIC                     | -8.28  | 2.00   | -16.01 | -14.60 | -1.97  | -14.66 | 0.67   |
| BIC                     | -7.14  | 3.14   | -14.84 | -13.46 | -0.83  | -13.52 | 1.76   |
| C.V (best Lambda)       | 0.18   | 0.45   | 0.08   | 0.09   | 0.34   | 0.10   | 0.32   |
| Nb of variables:        | 6      | 1      | 14     | 11     | 1      | 10     | 1      |
| MSE (Mean Square Error) | 0.51   | 0.96   | 0.21   | 0.23   | 0.78   | 0.23   | 0.89   |
| R <sup>2</sup>          | 0.61   | 0.22   | 0.83   | 0.81   | 0.30   | 0.81   | 0.17   |
| <b>Protein (DS)</b>     |        |        |        |        |        |        |        |
| C.V (best Lambda)       | 0.06   |        |        |        |        | 0.17   |        |
| AIC                     | -15.15 |        |        |        |        | -7.69  |        |
| BIC                     | -14.02 |        |        |        |        | -6.55  |        |
| Nb of variables:        | 11     |        |        |        |        | 6      |        |
| MSE (Mean Square Error) | 0.21   |        |        |        |        | 0.54   |        |
| R <sup>2</sup>          | 0.81   |        |        |        |        | 0.53   |        |
| <b>PMT (DS)</b>         |        |        |        |        |        |        |        |
| C.V (best Lambda)       | 0.19   | 0.41   | 0.33   |        | 0.38   |        | 0.24   |
| AIC                     | -5.76  | -3.94  | -3.56  |        | 2.00   |        | -1.55  |
| BIC                     | -4.63  | -2.80  | -2.38  |        | 3.14   |        | -0.46  |
| Nb of variables:        | 4      | 1      | 4      |        | 1      |        | 1      |
| MSE (Mean Square Error) | 0.62   | 0.70   | 0.73   |        | 0.96   |        | 0.79   |
| R <sup>2</sup>          | 0.35   | 0.45   | 0.50   |        | 0.15   |        | 0.24   |
| <b>BEM (DS)</b>         |        |        |        |        |        |        |        |
| C.V (best Lambda)       | 0.13   | 0.36   |        | 0.19   | 0.18   | 0.13   | 0.17   |
| AIC                     | -10.11 | -0.70  |        | -10.37 | -8.21  | -8.67  | 2.00   |
| BIC                     | -9.02  | 0.39   |        | -9.28  | -7.11  | -7.58  | 3.04   |
| Nb of variables:        | 11     | 2      |        | 6      | 5      | 4      | 1      |
| MSE (Mean Square Error) | 0.40   | 0.83   |        | 0.39   | 0.49   | 0.47   | 0.95   |
| R <sup>2</sup>          | 0.65   | 0.32   |        | 0.71   | 0.61   | 0.56   | 0.03   |

527 AIC= Akaike Information Criterion

528 BIC=Bayesian Information Criterion

529 C. V= Cross validation

530

531 **Table 8:** Microbial parameters included in the LASSO models for wheat grain quality of the drought-tolerant genotype  
 532 (DT).

| <b>Gluten-May10</b> |                         | <b>Protein-May10</b> |                         | <b>PMT-May21</b> |                         | <b>BEM-June07</b> |                        |
|---------------------|-------------------------|----------------------|-------------------------|------------------|-------------------------|-------------------|------------------------|
| Variables           | Coefficients            | Variables            | Coefficients            | Variables        | Coefficient             | Variables         | Coefficient            |
| Intercept           | $-1.60 \times 10^{-14}$ | Intercept            | $-2.50 \times 10^{-15}$ | Intercept        | $-2.00 \times 10^{-16}$ | Intercept         | $3.63 \times 10^{-14}$ |
| Bacteria.PC2        | 0.492                   | Bacteria.PC2         | -0.141                  | Biolog.PC2       | -0.433                  | Bacteria.PC1      | -0.184                 |
| Fungi.PC3           | -0.011                  | Fungi.PC1            | -0.184                  | ACE fungi        | 0.225                   | Bacteria.PC2      | 0.254                  |
| Biolog.PC2          | 0.354                   | Fungi.PC3            | -0.188                  |                  |                         | Bacteria.PC3      | -0.051                 |
| Biolog.PC3          | 0.016                   | Fungi.PC5            | -0.072                  |                  |                         | Fungi.PC2         | -0.102                 |
| Biolog.PC4          | -0.153                  | Biolog.PC1           | 0.111                   |                  |                         | Fungi.PC4         | -0.099                 |
| Biolog.PC5          | -0.086                  | Biolog.PC4           | -0.185                  |                  |                         | Fungi.PC5         | 0.643                  |
| Simpson bacteria    | 0.628                   | Biolog.PC5           | -0.122                  |                  |                         | Biolog.PC2        | 0.365                  |
| PD bacteria         | -0.997                  | <i>nirK</i>          | -0.183                  |                  |                         | Biolog.PC3        | -0.249                 |
| ACE bacteria        | 0.270                   |                      |                         |                  |                         | Biolog.PC4        | 0.381                  |
| Chao1 fungi         | -0.202                  |                      |                         |                  |                         | Simpson bacteria  | 0.498                  |
| <i>nosZ</i>         | -0.235                  |                      |                         |                  |                         | Chao1 bacteria    | -0.080                 |

533 PD: Phylogenetic diversity, ACE: Abundance-based Coverage Estimators, PC: principal component.

534

535 **Table 9:** Microbial parameters included in the LASSO models for the wheat grain quality of the drought-sensitive  
 536 genotype (DS).

| Gluten-June 07   |                        | Protein-May10  |                         | PMT-June 07  |                        | BEM-June21   |                      |
|------------------|------------------------|----------------|-------------------------|--------------|------------------------|--------------|----------------------|
| Variables        | Coefficients           | Variables      | Coefficients            | Variables    | Coefficients           | Variables    | Coefficients         |
| Intercept        | $7.96 \times 10^{-15}$ | Intercept      | $-1.80 \times 10^{-17}$ | Intercept    | $3.57 \times 10^{-16}$ | Intercept    | $-8 \times 10^{-17}$ |
| Bacteria.PC2     | -0.018                 | Bacteria.PC4   | -0.541                  | Bacteria.PC4 | -0.009                 | Bacteria.PC2 | -0.010               |
| Bacteria.PC5     | 0.216                  | Fungi.PC1      | -0.219                  | Fungi.PC4    | 0.146                  | Bacteria.PC4 | -0.263               |
| Fungi.PC1        | 0.012                  | Fungi.PC3      | -0.093                  | Fungi.PC5    | 0.120                  | Fungi.PC2    | -0.086               |
| Fungi.PC2        | -0.361                 | Fungi.PC4      | -0.262                  | Biolog.PC5   | 0.026                  | Biolog.PC4   | -0.151               |
| Fungi.PC4        | -0.026                 | Fungi.PC5      | 0.141                   |              |                        | Chao1 fungi  | 0.182                |
| Fungi.PC5        | -0.072                 | Biolog.PC3     | 0.027                   |              |                        | F:B ratio    | 0.213                |
| Biolog.PC1       | 0.317                  | Biolog.PC4     | -0.099                  |              |                        |              |                      |
| Biolog.PC3       | -0.078                 | Biolog.PC5     | -0.009                  |              |                        |              |                      |
| Biolog.PC5       | 0.024                  | Chao1 bacteria | -0.284                  |              |                        |              |                      |
| Simpson bacteria | 0.089                  | Chao1 fungi    | 0.154                   |              |                        |              |                      |
| PD fungi         | -0.150                 | PD fungi       | 0.012                   |              |                        |              |                      |
| AOB              | -0.460                 |                |                         |              |                        |              |                      |
| <i>nosZ</i>      | 0.115                  |                |                         |              |                        |              |                      |
| F:B ratio        | -0.031                 |                |                         |              |                        |              |                      |

537 PD: Phylogenetic diversity, F:B: Fungal: Bacterial ratio, PC: principal component.

538



539 **Figure 1.**

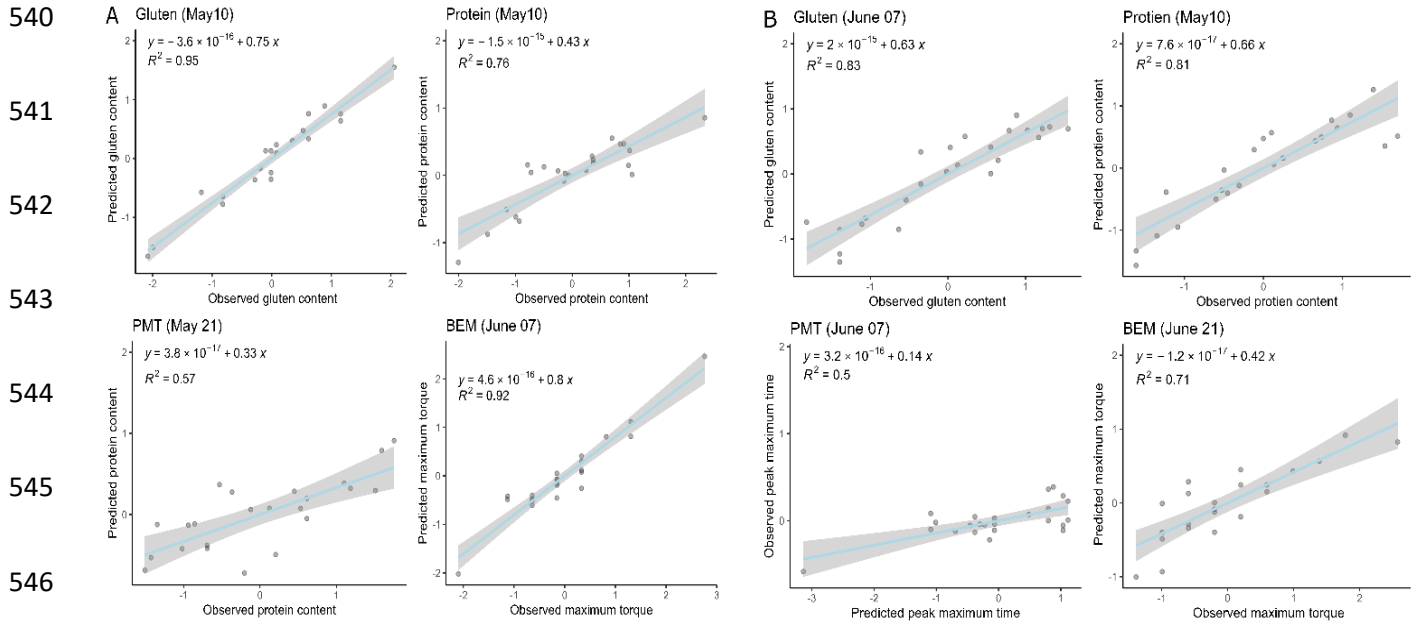

549 **Figure 2.**

550

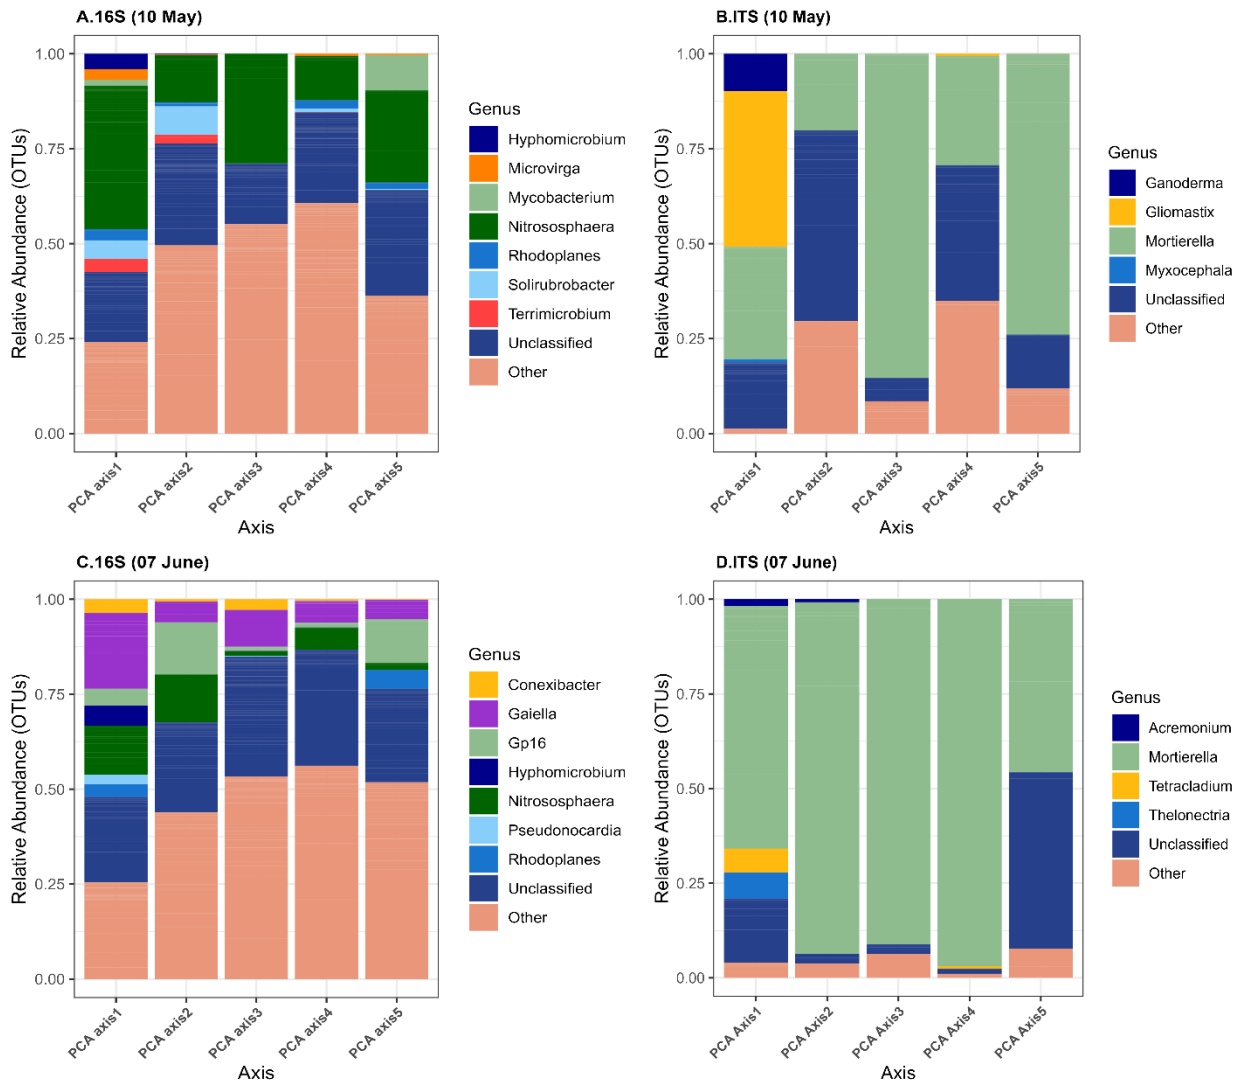

551 **Figure 3.**

552

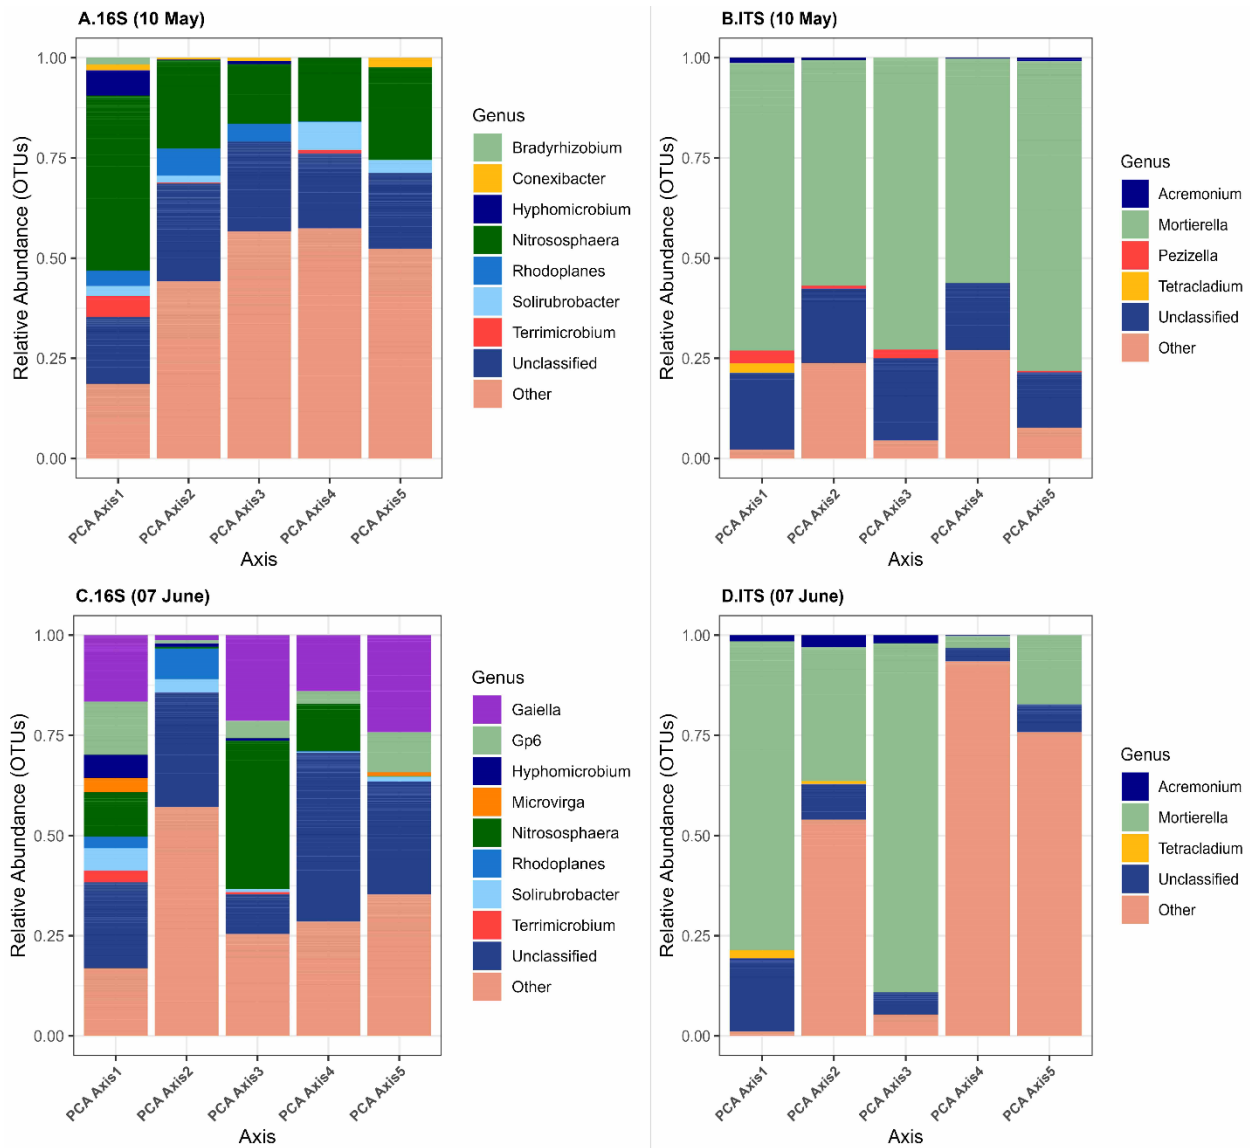

553

554
